# Supplementary material for: Theoretical studies of molecular orientation and charge recombination in poly-paraphenylenevinylene light-emitting diodes
Source: Royal Society of Chemistry journal article supplement (doi:10.1039/c5cp03235k), 2015-01-01
Supplement: c5cp03235k1.pdf [file c5cp03235k1.pdf]

## Applied Dispersion Correction

We computed the dimer energies applied Grimme's dispersion corrections.<sup>41</sup> Because we contrasted the energies of the dimer systems estimated almost equal magnitude of the dispersion forces in this paper, the dispersion interaction does not make a difference to the charge-recombination factors and the parameters for Marcus-Hush equation. However, the van der Waals interaction is important in the intermolecular interactions for large  $\pi$ -systems, we obtained the charge-recombination factors and the four-states energies with Grimme's dispersion correction as a function of the acceptor rotation angle or the donor rotation angle.

| angle [°] | $\log_{10}(\kappa [s^{-1}])$ | (1)         | (2)         | (3)         | (4)         |
|-----------|------------------------------|-------------|-------------|-------------|-------------|
| A15       | -4.13                        | -1698.33803 | -1698.37914 | -1698.32908 | -1698.38889 |
| A30       | -0.30                        | -1698.34295 | -1698.37973 | -1698.33412 | -1698.38972 |
| A45       | 2.20                         | -1698.34591 | -1698.37872 | -1698.33766 | -1698.38869 |
| A60       | 0.33                         | -1698.34704 | -1698.37967 | -1698.33883 | -1698.38939 |
| A75       | 3.97                         | -1698.35233 | -1698.38114 | -1698.34578 | -1698.39110 |

---

---

A90

7.73 -1698.35579 -1698.38162 -1698.35009 -1698.39168

---

---
